# Supplementary material
Source: Springer Nature journal article supplement (https://www.springermedizin.de/resource/supplementary/12958_2006_326_MOESM4_ESM.pdf/9567630)

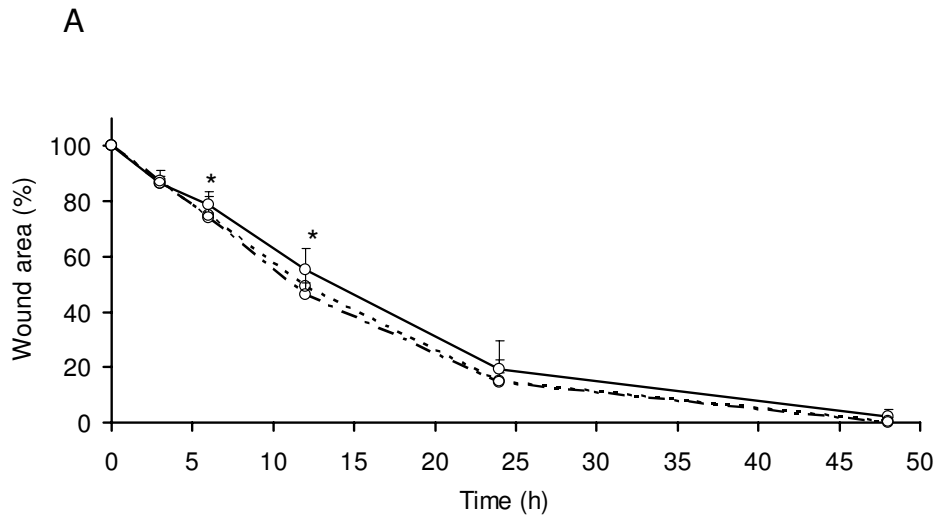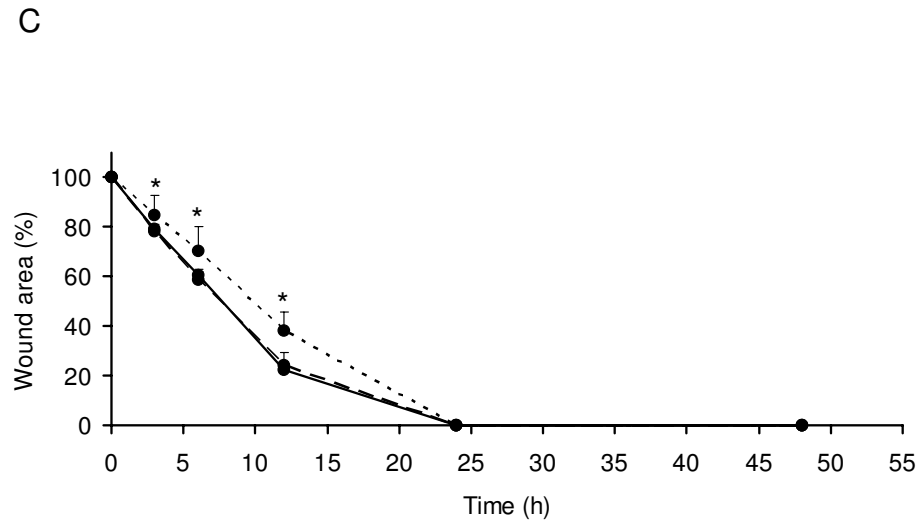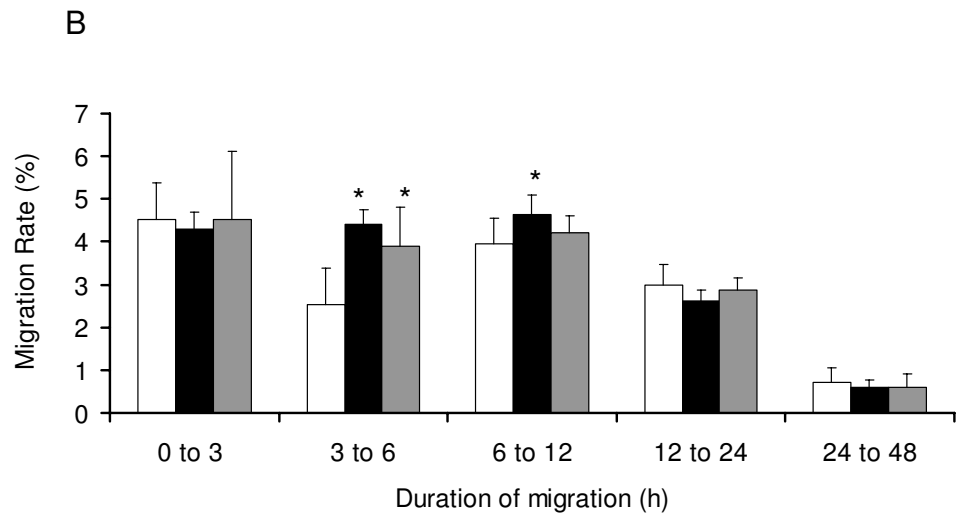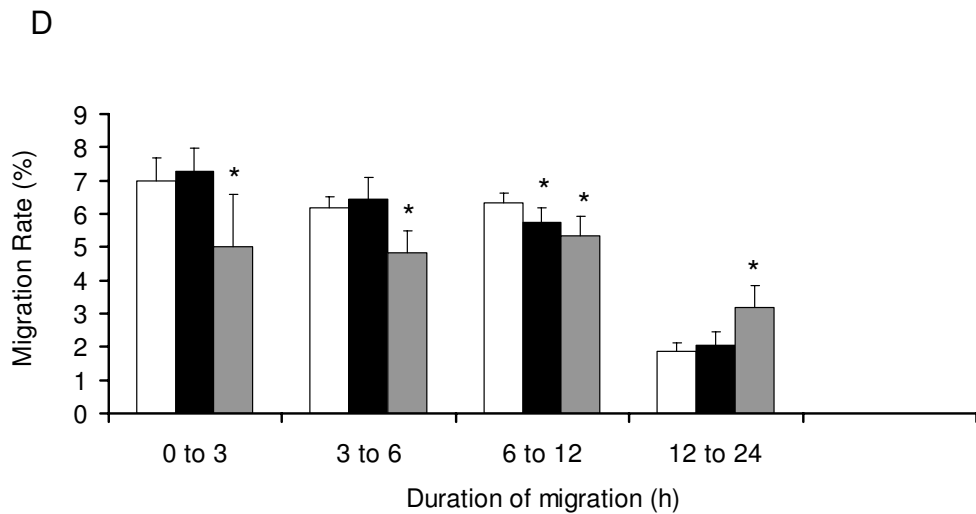

Supplement: MOESM4 [file 9567630]
